# Supplementary material for: Microwave effect on the surface composition of the Urushibara Ni hydrogenation catalyst and improved reduction of acetophenone
Source: Royal Society of Chemistry journal article supplement (doi:10.1039/b808188c), 2008-01-01
Supplement: b808188c.pdf [file b808188c.pdf]

### Supplementary Information

## Microwave Effect on the Surface Composition of the Urushibara Ni Hydrogenation Catalyst and Improved Reduction of Acetophenone

Satoshi Horikoshi,<sup>\*a b</sup> Junichi Tsuzuki,<sup>a</sup> Masatsugu Kajitani,<sup>a</sup> and Nick Serpone<sup>\*c</sup>

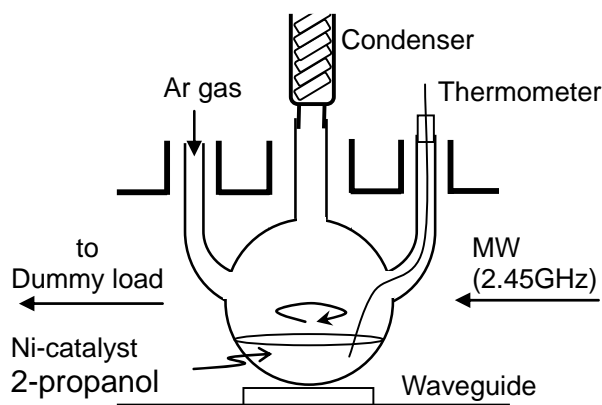

**Fig. 1S** – Schematic illustration of the reflux system of the 2.45 GHz microwave system operated in the single mode.

### Analyses of reagent and product

**Acetophenone:** <sup>1</sup>H-NMR data (CDCl<sub>3</sub>, relative to TMS): δ = 2.38 ppm (s, 3H), 7.26 ppm (t, 2H), 7.38 ppm (t, 1H), 7.77 ppm (d, 2H). GC-MS data (EI<sup>+</sup>, 1.3 kV): m/z (intensity) = **120** (28, {M}), 105 (90), 77 (100), 63 (6), 51 (67), 45 (1).

**1-Phenylethanol:** <sup>1</sup>H-NMR data (CDCl<sub>3</sub>, relative to TMS): δ = 1.40 ppm (d, 3H, J = 7.0 Hz), 3.03 ppm (s, 1H), 4.77 ppm (q, 1H, J = 6.5 Hz), 7.07 ppm (t, 1H), 7.16 ppm (t, 2H), 7.20 ppm (d, 2H). GC-MS data (EI<sup>+</sup>, 1.3 kV): m/z (intensity) = **122** (47, {M}), 120 (60), 105 (89), 77 (100), 63 (20), 51 (75), 45 (15).

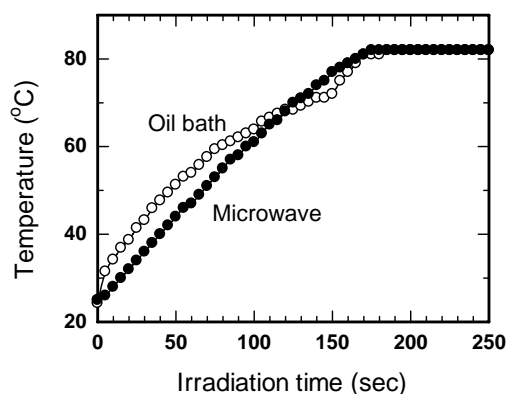

**Fig. 2S** – Temperature time profiles of heating 2-propanol by microwave radiation (power, 100 Watts) and by conventional heating with an oil bath.

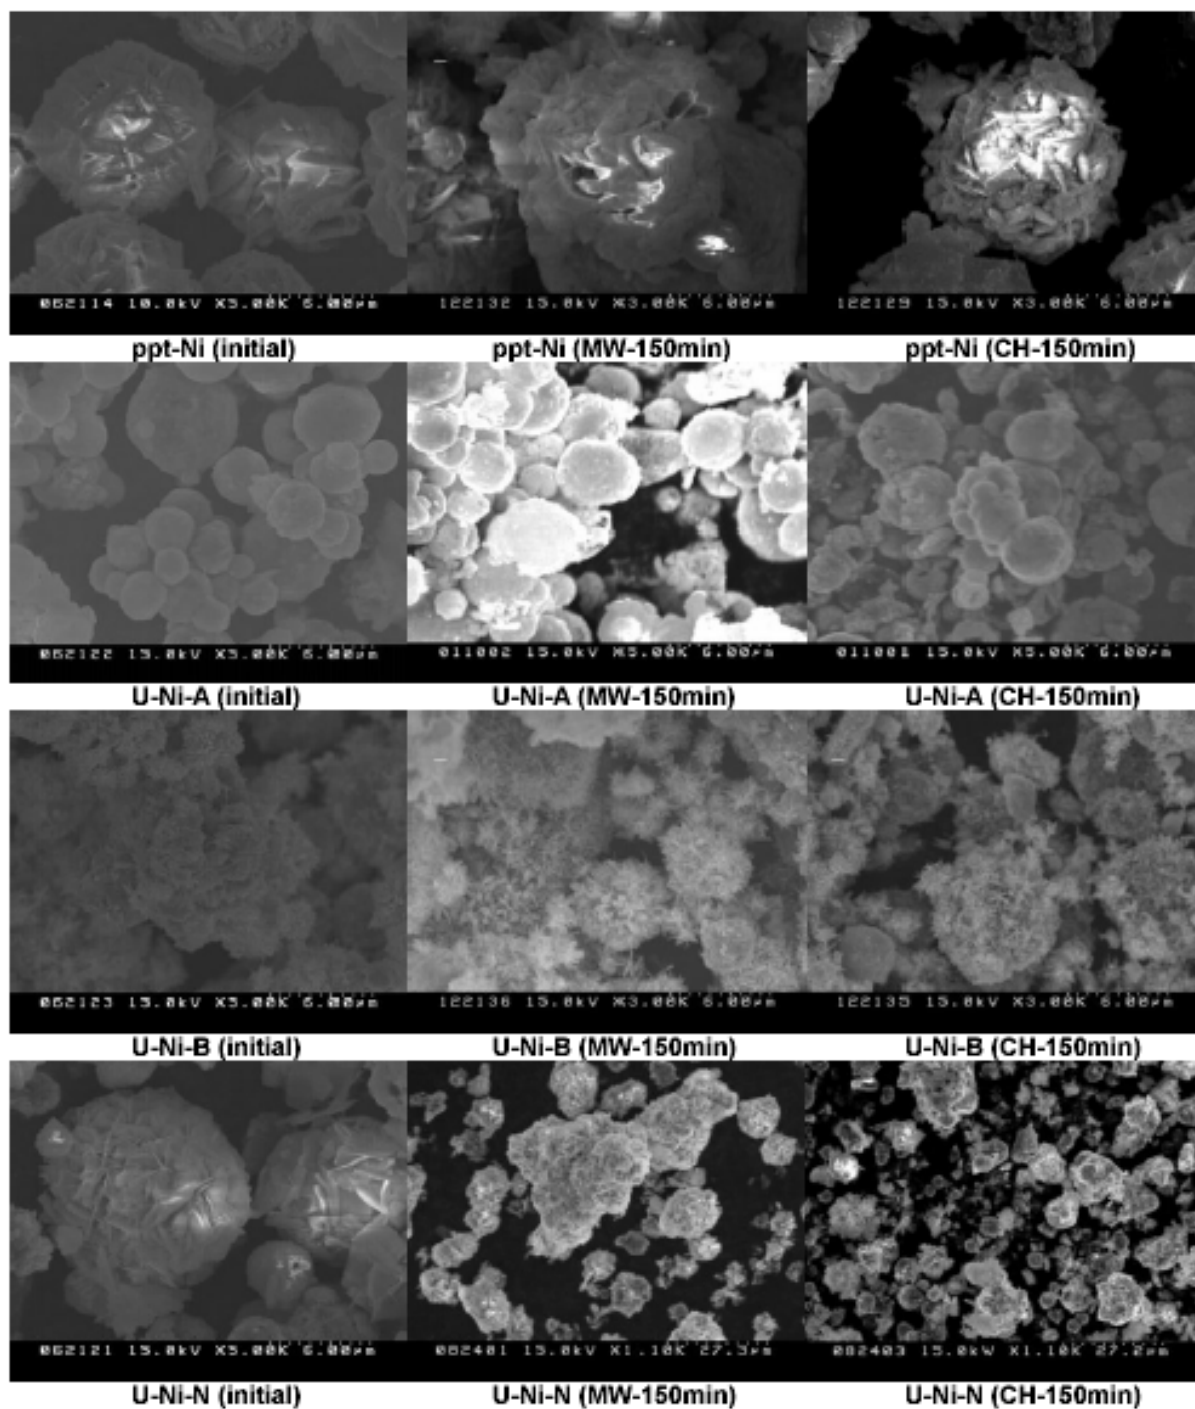

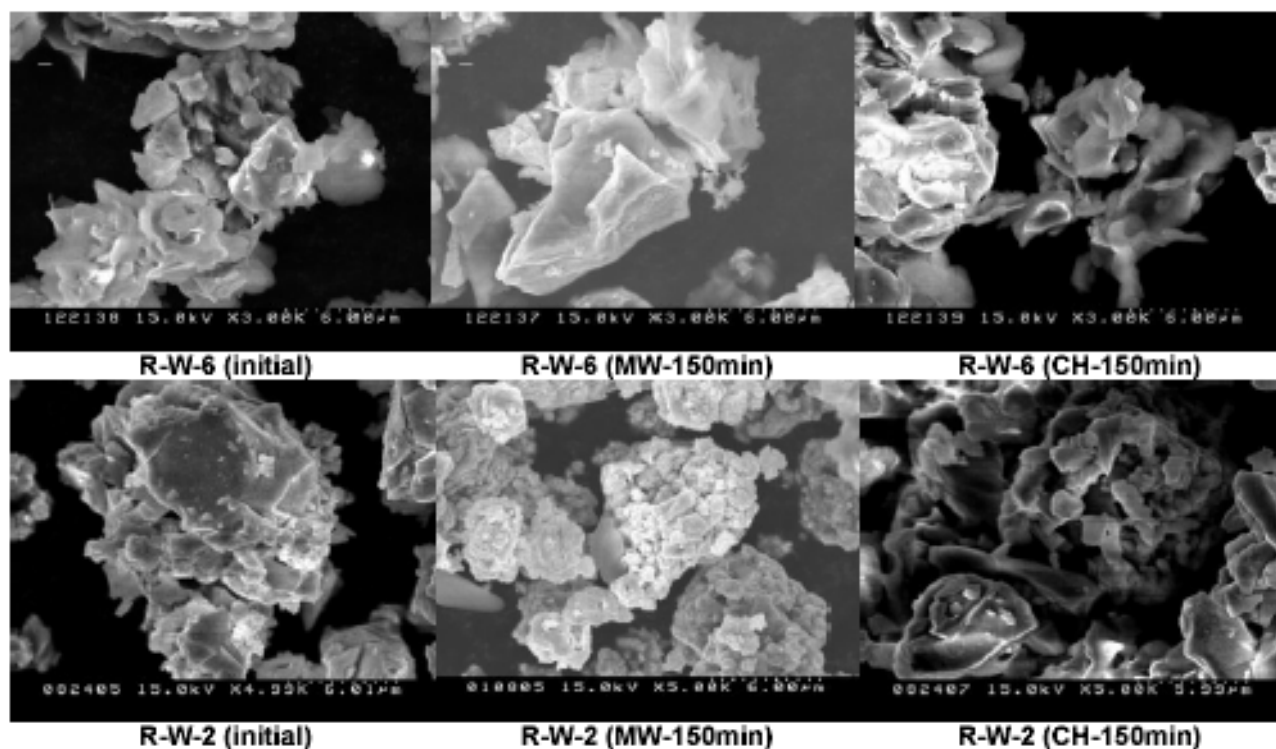

**Fig. 3S** – Scanning Electron Microscope images of the ppt-Ni, U-Ni-A, U-Ni-B, U-Ni-N, R-W-6 and R-W-2 catalyst specimens before and after 160 min into the hydrogenation reaction with dielectric heating (MW) and conventional heating (CH).

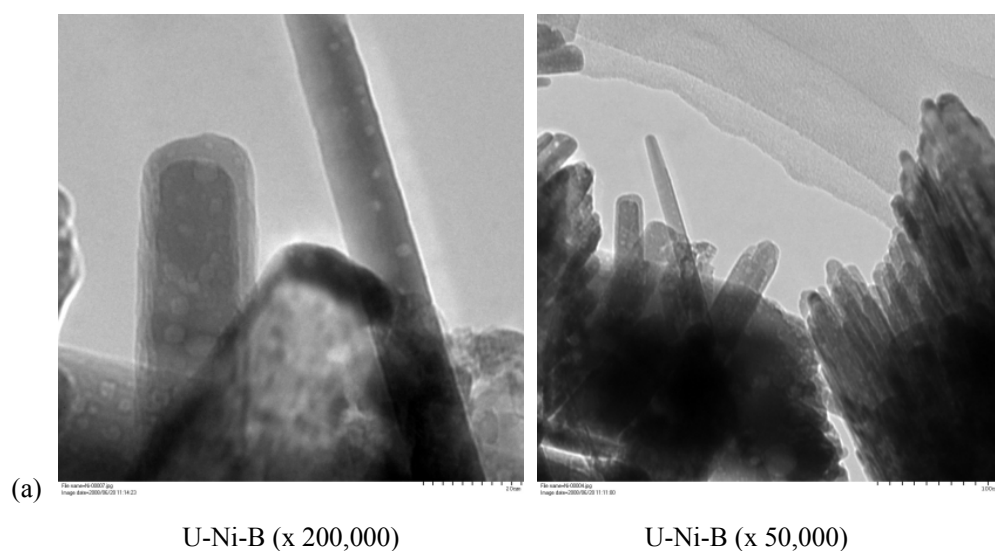

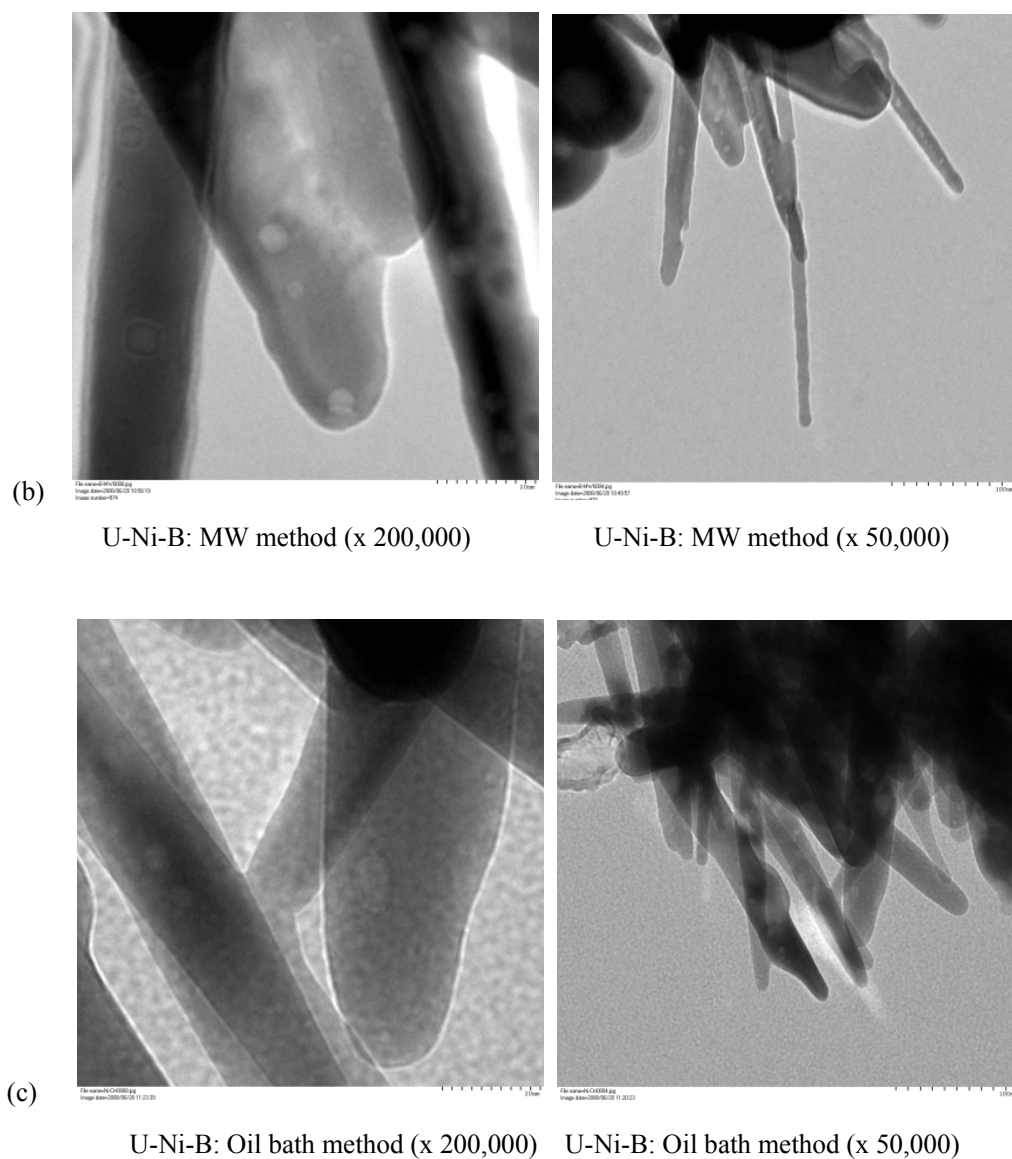

Figure 4S. – TEM micrographs for the U-Ni-B catalyst before (a) and after microwave dielectric heating (b) and conventional heating in oil bath (c).

Table 1S. - X-ray photoelectron spectroscopy (XPS) analysis of U-Ni-B catalyst before and after 150 min into the hydrogenation reaction with dielectric heating (MW) and conventional heating (CH). XPS: ULVAC-Phi Co., Ltd., ESCA-5800ci

|                   | Zn   | Ni | O   |
|-------------------|------|----|-----|
| U-Ni-B            | 23.3 | 1  | 5.7 |
| U-Ni-B (MW)       | 48   | 1  | 1.1 |
| U-Ni-B (Oil bath) | 82   | 1  | 17  |
